# Supplementary material for: Comparing the Clinical Performance of the New 19-G ViziShot FLEX and 21- or 22-G ViziShot 2 Endobronchial Ultrasound-guided Transbronchial Needle Aspiration Needles
Source: PubMed Central journal article supplement — Intern Med. 2018 Aug 24;57(24):3515–20. doi: 10.2169/internalmedicine.0967-18 (PMC6355416; doi:10.2169/internalmedicine.0967-18), 2018-08-24
Supplement: 1349-7235-57-3515-s001.pdf [file 1349-7235-57-3515-s001.pdf]

**Supplemental Table 1.**Pathological features of specimens obtained by EBUS-TBNA.

|         | Clinical diagnosis           | 19G                                                 | 21G or 22G                                             |
|---------|------------------------------|-----------------------------------------------------|--------------------------------------------------------|
| Case 1  | Retinal<br>hemangioblastoma  | The tumors are hypervascular<br>histopathologically | Negative <sup>a</sup><br>(Blood specimens only)        |
| Case 2  | Lung squamous cell<br>cancer | Negative <sup>a</sup><br>(Bronchial cartilage only) | Squamous cell carcinoma<br>cells(more than 100 counts) |
| Case 3  | Lung adenocarcinoma          | Adenocarcinoma cells<br>(more than 100 counts)      | Adenocarcinoma cells<br>(less than 100 counts)         |
| Case 4  | LCNEC                        | The tumor cells<br>(more than 21G specimens)        | The tumor cells<br>(less than 19G specimens)           |
| Case 5  | Lymphoma                     | Diffuse large B cell<br>lymphoma is confirmed       | -                                                      |
| Case 6  | Sarcoidosis                  | Epithelioid cell granuloma                          | Epithelioid cell granuloma                             |
| Case 7  | Sarcoidosis                  | Epithelioid cell granuloma                          | Epithelioid cell granuloma                             |
| Case 8  | Sarcoidosis                  | Epithelioid cell granuloma                          | Epithelioid cell granuloma                             |
| Case 9  | Sarcoidosis                  | Epithelioid cell granuloma                          | -                                                      |
| Case 10 | Tuberculous<br>lymphadenitis | Caseous granuloma                                   | Negative <sup>a</sup>                                  |
| Case 11 | Tuberculous<br>lymphadenitis | Negative <sup>a</sup>                               | Negative <sup>a</sup>                                  |

EBUS-TBNA, endobronchial ultrasound-guided transbronchial needle aspiration; LCNEC, large-cell neuroendocrine carcinoma; 19G, 19 gauge needle; 21G or 22G, 21 or 22 gauge needle; <sup>a</sup>Negative, not diagnosed pathologically.
